# Supplementary material for: Nuclear Functions of KaeA, a Subunit of the KEOPS Complex in Aspergillus nidulans
Source: MDPI journal article supplement (doi:10.3390/ijms231911138), 2022-09-22

**Table S11 – Potential phosphorylation sites in KaeA**

Results of the *A. nidulans* KaeA scan with NetPhos-3.1. The NetPhos 3.1 server predicts serine, threonine or tyrosine phosphorylation sites in eukaryotic proteins using ensembles of neural networks. Both generic [77] and kinase specific predictions [78] were performed. Stringent settings were used: for each residue only the best prediction and only the scores higher than 0.5 are shown.

| Position of the phosphorylated amino acid residue | Phosphorylated amino acid Residue | Sequence context of the phosphorylation site | Score | Kinase  |
|---------------------------------------------------|-----------------------------------|----------------------------------------------|-------|---------|
| 25                                                | S                                 | PKDGSTPQV                                    | 0.628 | PKA     |
| 26                                                | T                                 | KDGSTPQVL                                    | 0.511 | p38MAPK |
| 36                                                | T                                 | NIRHTYVSP                                    | 0.770 | PKC     |
| 37                                                | Y                                 | IRHTYVSP                                     | 0.749 | unsp    |
| 39                                                | S                                 | HTYVSPGE                                     | 0.928 | unsp    |
| 50                                                | T                                 | LPKDTARHH                                    | 0.589 | unsp    |
| 60                                                | S                                 | SWVVS LVKK                                   | 0.508 | PKC     |
| 72                                                | S                                 | EARISVDDV                                    | 0.997 | unsp    |
| 81                                                | Y                                 | DCICYTKGP                                    | 0.538 | INSR    |
| 102                                               | S                                 | ARTLSLLWG                                    | 0.676 | PKA     |
| 126                                               | T                                 | GRLITGASN                                    | 0.719 | PKC     |
| 129                                               | S                                 | ITGASNPVV                                    | 0.512 | cdc2    |
| 135                                               | Y                                 | PVVLVSGG                                     | 0.682 | unsp    |
| 141                                               | T                                 | SGGNTQVIA                                    | 0.511 | unsp    |
| 148                                               | S                                 | IAYSSQRYR                                    | 0.791 | PKC     |
| 151                                               | Y                                 | SSQRYRIFG                                    | 0.596 | unsp    |
| 172                                               | T                                 | RFARTLHIS                                    | 0.538 | PKC     |
| 183                                               | Y                                 | PAPGYNIEQ                                    | 0.527 | EGFR    |
| 200                                               | Y                                 | VDLPYTVKG                                    | 0.611 | unsp    |
| 237                                               | T                                 | EEDVTDVTP                                    | 0.519 | CKII    |
| 240                                               | T                                 | VTDVTPVSD                                    | 0.799 | unsp    |
| 243                                               | S                                 | VTPVSDGAL                                    | 0.921 | unsp    |
| 249                                               | S                                 | GALESRKPT                                    | 0.977 | unsp    |
| 253                                               | T                                 | SRKPTRADL                                    | 0.801 | PKA     |
| 260                                               | S                                 | DLCFSLQET                                    | 0.547 | unsp    |
| 311                                               | S                                 | DRGGSVHAT                                    | 0.996 | unsp    |
| 337                                               | T                                 | LAYKTGFRT                                    | 0.728 | PKC     |
| 341                                               | T                                 | TGFRTPLKE                                    | 0.551 | cdk5    |
| 346                                               | S                                 | PLKESTCTQ                                    | 0.916 | unsp    |
| 349                                               | T                                 | ESTCTQRFR                                    | 0.847 | PKC     |
| 354                                               | T                                 | QRFRTDDVF                                    | 0.573 | unsp    |

## Graphical representation of phosphorylation sites in KaeA:

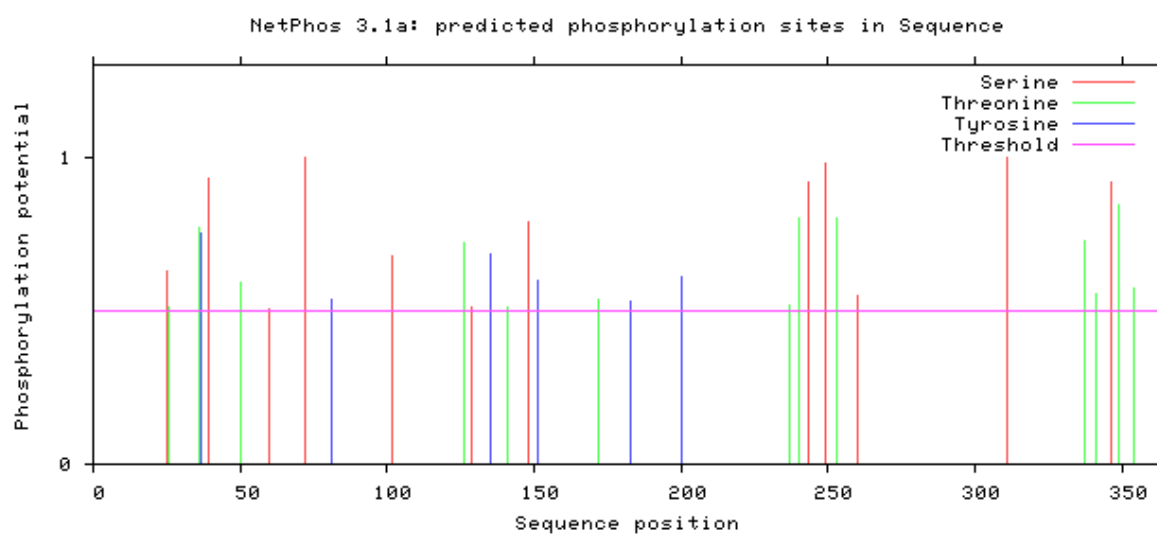

Supplement: s1 [file s1]
