# Supplementary material for: Nuclear Functions of KaeA, a Subunit of the KEOPS Complex in Aspergillus nidulans
Source: MDPI journal article supplement (doi:10.3390/ijms231911138), 2022-09-22
Supplement: s1 [file s1]

**Table S1 – Primer sequences**

**A. Primers for RT-qPCR**

| AN gene number | Forward primer       | Reverse primer       |
|----------------|----------------------|----------------------|
| AN0948         | CTGATAGGTCGCAATGGCAC | CGCATAACCGTCTTCACTAG |
| AN10854        | TCTCCGTCTGTGGTCACGAG | GCGATCGGAGGTAAGAGGAG |
| AN1298         | CTCCGGCATTGATACAGATG | AGATCTGCGACATATGGCTC |
| AN1812         | CGAACGCACCACAGCTCTTC | CGAACGCACCACAGCTCTTC |
| AN1848         | TAGTGTGCCGCCATCCACC  | TCATAGCAAGCGTGGCATCC |
| AN2366         | CCTGAATACAACGCCAACAC | CTCAGAAGGAAGCGAAGAAG |
| AN5170         | GCAGCAGAACATCGTAGATC | CTTGTGGCGTTGAGAATGC  |
| AN6076         | CCAAGAACGCCGACATGCTC | CCATGCGTGGACGGTAGATC |
| AN8168         | CGCAGGTCCATTCACTCAAG | TATTGATGAAGGCGAGGTGC |

**B. Primers for primer-extension**

| Name             | sequence            |
|------------------|---------------------|
| IletRNArev       | GGGGGTCGAACCCTCGAC  |
| IletRNArev-yeast | GGGATCGAACCGCTGATC  |
| ValtRNArev       | CGGGCTCGATCCGGCGACC |

**C. Primers for cloning**

|                                                   |
|---------------------------------------------------|
| <b>Golden Gate for obtaining KaeA::GFP fusion</b> |
| <b>KaeA</b>                                       |
| <b>F: TTTACCTGCTAATGGCGCCATCGGTCTTGAAGGTTT</b>    |

|                                                                                                                                                                                                 |
|-------------------------------------------------------------------------------------------------------------------------------------------------------------------------------------------------|
| R: TTTACCTGCGCCGATCTCTCCATTGCACAAATAC                                                                                                                                                           |
| GFPPyr                                                                                                                                                                                          |
| F: TTTACCTGCTATAAGATGGAGCTGGTGCAGGCGCTG                                                                                                                                                         |
| R: TTTACCTGCGATACTGTCTGAGAGGAGGCACTGATG                                                                                                                                                         |
| DF1                                                                                                                                                                                             |
| F: TTTACCTGCGCGCACAGACTTATTCAGCCATATCCTG                                                                                                                                                        |
| R: TTTACCTGCAGTCATTGCGCTTCATATCCGCCTATC                                                                                                                                                         |
| DF2:                                                                                                                                                                                            |
| F: TTTACCTGCCGTGCAATACAGGTGTCTTGGACAAGGCTTC                                                                                                                                                     |
| R: TTTACCTGCTTATGGCGCCGATGAAGGATGATAGCAGTC                                                                                                                                                      |
| Overlap extension PCR for obtaining KaeA::TEV::GFP fusion                                                                                                                                       |
| First step                                                                                                                                                                                      |
| F: TTGCCCAGGCTGGTATGCTCGCATATAAGACAGGCTTCCGGACGCCGCTC                                                                                                                                           |
| R: GGCACCGGCTCCAGCGCCTGCACCAGCTCCGTGGTGCCCAGCGGATTGGA                                                                                                                                           |
| Second step                                                                                                                                                                                     |
| 5'-<br>TTGCCCAGGCTGGTATGCTCGCATATAAGACAGGCTTCCGGACGCCGCTCAAGGAATCTACGTGCA<br>CGCAGCGCTTCCGGACGGATGATGTATTTGTGCAATGGAGAGATGAGAACCTGTACTTCCAATCCG<br>CTGGGCACCACGGAGCTGGTGCAGGCGCTGGAGCCGGTGCC-3' |
| Overlap extension PCR for obtaining KaeA::HA                                                                                                                                                    |
| First step                                                                                                                                                                                      |
| F: CGGACGGATGATGTATTTGTGCAATGGAGAGATTACCCATACGATGTTCC                                                                                                                                           |
| R: AGAGGGTGAAGAGCATTGTTTGAGGCGACCGGTAGCGTAATCTGGAACGT                                                                                                                                           |
| Second step                                                                                                                                                                                     |
| 5'-<br>CGGACGGATGATGTATTTGTGCAATGGAGAGATTACCCATACGATGTTCTGACTATGCGGGCTATC<br>CGTATGACGTCCCGGACTATGCAGGATCCTATCCATATGACGTTCAGATTACGCTACCGGTCGCCT<br>CAAACAATGCTCTTCACCCTCT-3'                    |

#### D. Primers for ChiP-Seq qPCR control experiment

| Name         | sequence             |
|--------------|----------------------|
| niiA–niaDfw  | CGGGAACTGGGAACTGTCC  |
| niiA–niaDrev | GATTCCGAGGCTCTGATTGG |
