# Supplementary material for: Nuclear Functions of KaeA, a Subunit of the KEOPS Complex in Aspergillus nidulans
Source: MDPI journal article supplement (doi:10.3390/ijms231911138), 2022-09-22
Supplement: s1 [file s1]

**Table S7 - Alignment summary data for ChIP-Seq analysis**

| <b>Sample</b> | <b>Quality control passed reads</b> | <b>Secondary reads</b> | <b>Mapped reads</b> | <b>Properly paired reads</b> |
|---------------|-------------------------------------|------------------------|---------------------|------------------------------|
| JG_Input1_FR  | 20 603 923                          | 7 427                  | 18 598 914 (90.27%) | 18 396 952 (89.32%)          |
| JG_Input2_FR  | 23 824 824                          | 9 706                  | 21 409 760 (89.86%) | 21 078 070 (88.51%)          |
| JG_Input3_FR  | 13 852 838                          | 5 500                  | 12 552 649 (90.61%) | 12 406 246 (89.59%)          |
| JG_IP1_FR     | 18 683 924                          | 3 924                  | 17 783 487 (95.18%) | 17 688 710 (94.69%)          |
| JG_IP2_FR     | 12 864 888                          | 2 672                  | 12 390 476 (96.31%) | 12 321 010 (95.79%)          |
| JG_IP2_FR     | 14 186 414                          | 3 572                  | 13 372 157 (94.26%) | 13 315 084 (93.88%)          |
