# Supplementary material for: Nuclear Functions of KaeA, a Subunit of the KEOPS Complex in Aspergillus nidulans
Source: MDPI journal article supplement (doi:10.3390/ijms231911138), 2022-09-22
Supplement: s1 [file s1]

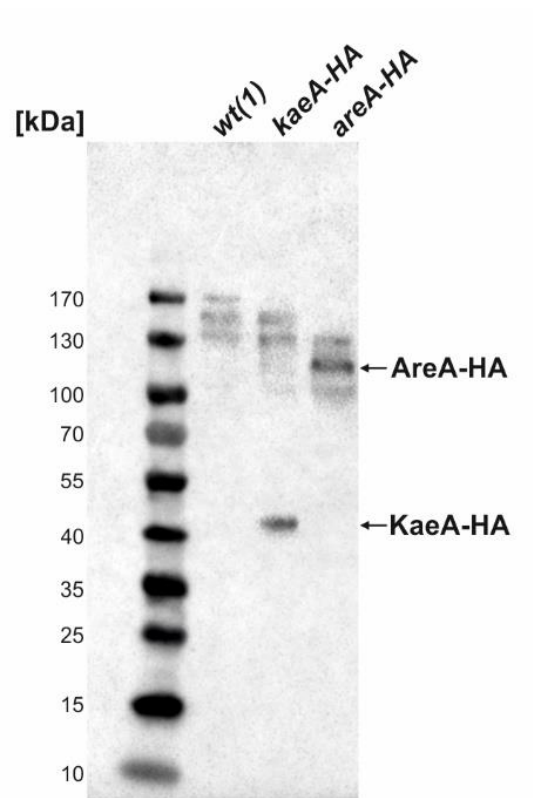

**Figure S1. Western analysis of protein extracts from strains expressing KaeA-HA (7) and AreA-HA (9) fusions. The positions of fusion proteins are indicated.**
